# Supplementary material
Source: Elsevier journal article supplement (https://www.sciencedirect.com/science/article/pii/S2173507720302349)
Supplement: mmc1 [file S2173507720302349:mmc1.doc]

**MATERIAL Y MÉTODO:**

Estudio retrospectivo, descriptivo y comparativo de todos los pacientes intervenidos de esofaguectomía entre enero de 2015 y diciembre de 2018 en nuestro centro. Se incluyeron todos los pacientes diagnosticados de neoplasia esofágica maligna o enfermedad benigna complicada intervenidos de forma electiva en los que se realizó una esofaguectomía con abordaje abdominal y transtorácico tipo Ivor-Lewis, reconstrucción con gastroplastia y sin piloroplastia asociada. Se excluyeron pacientes intervenidos de forma urgente. La serie se dividió en 2 grupos consecutivos: el grupo S (desde enero de 2015 a octubre de 2016), donde se incluyeron los pacientes en los que se colocó sonda descompresiva en la plastia durante el postoperatorio inmediato, y el grupo N, con aquellos casos en los que no se colocó ni empleó sonda descompresiva durante el periodo perioperatorio (desde noviembre de 2016 a diciembre de 2018). Las intervenciones fueron realizadas en el mismo centro por dos cirujanos con amplia experiencia en cirugía esofágica.

En el estudio preoperatorio, además del diagnóstico por el que se indicó la esofaguectomía, se recopilaron variables epidemiológicas y diferentes comorbilidades, tales como la edad, sexo, antecedentes personales o cirugías previas, clasificación ASA, tipo y estadificación tumoral y tratamiento neoadyuvante.

Todos los pacientes fueron sometidos al acondicionamiento de la plastia gástrica 3 semanas antes de la cirugía mediante embolización de las arterias esplénica y gástrica izquierda. Del mismo modo, todos los pacientes recibieron preparación mecánica del colon mediante el empleo de picosulfato de sodio en las 24 horas previas a la cirugía, además de la misma pauta de profilaxis antibiótica, medidas antitromboembólicas (heparina de bajo peso molecular y medias de compresión neumática) y profilaxis de náuseas y vómitos perioperatorios. En todos los casos se colocaron 1 ó 2 drenajes torácicos aspirativos. No se colocó drenaje abdominal ni se realizó ninguna técnica sobre el píloro para facilitar el vaciamiento de la plastia en ningún caso. A partir de enero de 2018, la realización de una yeyunostomía en el mismo acto quirúrgico se limitó a casos más seleccionados con desnutrición o mayor riesgo de problemas nutricionales, en base a los resultados obtenidos en nuestra unidad sobre ese aspecto3.

Se evaluó el tipo de abordaje, tiempo quirúrgico y la confección o no de una yeyunostomía de alimentación.

Durante el postoperatorio todos los pacientes fueron sometidos a la realización de un estudio radiológico con contraste oral y se analizó la presencia de náuseas o vómitos, el tiempo hasta el inicio de la tolerancia oral y/o enteral (en casos de yeyunostomía), la necesidad de colocación de sonda descompresiva y el tiempo de estancia hospitalaria y en la unidad de Reanimación. Así mismo, se recogieron las complicaciones postoperatorias, la mortalidad en los primeros 90 días y la tasa de reingresos.

Las variables y resultados han sido descritos como mediana y rango intercuartil (RIC) en el caso de variables continuas y mediante frecuencias en el caso de variables categóricas.

Para determinar la posible asociación entre el empleo de SNG y los distintos tipos de complicaciones se han ajustado diferentes modelos de regresión logística incluyendo el empleo de la misma como variable predictora principal y el sexo, índice de masa corporal (IMC), riesgo anestésico según la escala ASA (*American Society of Anesthesiologists*), Diabetes Mellitus, insuficiencia renal crónica, fumador o enfermedad pulmonar y el abordaje mínimamente invasivo como covariables por ser posibles factores de confusión.

Dado el elevado número de variables y el escaso tamaño muestral efectivo en la mayoría de los casos, los diferentes modelos se han ajustado mediante estadística bayesiana aplicando previas horseshoe a los coeficientes del modelo para evitar el sobreajuste3. En el caso de los días de estancia hospitalaria (variable continua) se ha desarrollado un modelo de regresión lineal. Sobre todos los modelos ajustados se han estimado intervalos de credibilidad al 95%. En el caso de que un intervalo de credibilidad sobre un OR (odd ratio) no incluyera el 1 se ha considerado el efecto de la variable correspondiente como significativo sobre la variable respuesta4.
